# Supplementary material for: Scale separation for gravity wave analysis from 3D temperature observations in the MLT region
Source: Copernicus journal article supplement (doi:10.5194/egusphere-2024-136), 2024-01-22
Supplement: Supplementary file [file egusphere-2024-136-AC2-supplement.pdf]

## Author response to Referee #2

We would like to thank referee #2 for the valuable comments. We have included the comments one by one, in bold text, along with our answers. Lines in the answers refer to the original manuscript. The blue colour indicates text added in the revised manuscript.

### Specific comments

- **Line 131: This study proposes to use the S3D spectral analysis method, but for completeness, the S-transform spectral method could be referenced as another commonly used method for analyzing the types of measurements to be provided by MATS.**

Referee #1 also suggested mentioning alternative methods for scale separation and wave analysis. See response to referee #1.

- **Line 146: It is pointed out that the swath width of about 200 km of MATS is a bottleneck for properly estimating some of the gravity wave spectral characteristics. Why was the instrument built with such a small swath, assuming that the estimation of the gravity wave momentum flux in the MLT region is indeed a key objective of the MATS measurements?**

When designing a telescope, one must compromise between the field of view and the resolution/sensitivity. MATS, which also considers smaller horizontal structures than those represented in the HIAMCM, was designed to prioritise the resolution, especially in the vertical - still weighing in a reasonably wide field of view. We have updated the manuscript with this information (Sect. 2.3 Orbit simulator):

L121: Parameters were determined from preliminary orbit properties before MATS was launched. They vary slightly from the final orbit of MATS, which ended up at 17:30 local solar time (ascending node) and an altitude of 590 km. *When designing a telescope, one must compromise between the field of view and the resolution/sensitivity. MATS, which also considers smaller horizontal structures than those represented in the HIAMCM, was designed to prioritise the resolution, especially in the vertical - still weighing in a reasonably wide field of view.* The output from the MATS tomography may vary in resolution and dimension both geographically and in time, as the settings of the instrument may be controlled based on external factors.

- **Lines 148-150: Perhaps add the dimensions for clarity here, 600 km x 190 km x 10 km (along track x across track x vertical). It would be good to provide some rationale or reference as to why the vertical width of the S3D boxes was set to 10 km. It is pointed out that the length of the cuboids is 600 km, but the sampling would be done every 100 km. What would be the reason for this oversampling, since the results of neighboring boxes would be largely correlated?**

The dimensions have been added in the updated manuscript (Sect. 2.4 S3D):

L148: The cuboid sizes are therefore chosen to be 600 km x 190 km x 10 km (along-track x across-track x vertical).

The vertical extent of the cube is selected based on the results from (Chen et al., 2022), but we decided to test a slightly smaller cube size, as we are ultimately interested in the vertical variations of wave properties. This has been added to the revised manuscript:

L146: Because of the large horizontal wavelengths of the waves represented in HIAMCM, cuboid sizes should cover the entire across-track range while keeping a large along-track range. Vertically, the cuboid size is selected to be slightly smaller than what was used in Chen et al. (2022). With a smaller size, vertical variations of wave properties can be obtained at a higher resolution.

The answer to why we have overlapping cuboids is that a wave is not defined at a point, so it is hard to consider for example GWMF at a point. It is therefore natural to do the wave analysis in overlaps. The large cubes allow for characterisation of the waves but the overlaps allow us to see spatial changes at a higher resolution. This has been added to the manuscript:

L148: Each cuboid will be aligned with the centre of the across-track range of the data, with overlapping cuboids positioned every 100 km in the along-track direction. This does lead to large overlaps between cuboids along the track, but as waves are not defined at a point it is natural to analyze them in such a manner. The large along-track extent helps to correctly capture wave parameters while the overlap opens for the analysis of spatial changes at a reasonably high resolution.

- **Line 176: It is pointed out that the zonal wavenumber 18 corresponds to wavelengths of about 2200 km at the equator. If the reference method is to use zonal wavenumber 18 for scale separation, it looks like there would be some discrepancy with the measurements of the MATS instrument, which has a swath width of ~200 km, which in combination with the S3D could allow estimation of wavelengths up to ~600 km. Isn't there some kind of gap between 600 and 2200 km wavelength?**

ZWN decomposition is a common method for scale separation, despite that it implies a latitudinal dependence on the wavelength in the zonal direction. As the referee points out this means that the residual field close to the equator potentially includes waves that are much larger than the field of view.

The choice of our reference was based on a study by Strube et al., (2020), where it was shown that ZWN decomposition at ZWN 18 captures the significant momentum in the upper troposphere and lower stratosphere.

The good agreement between the GWMF derived from wind residuals and the GWMF derived from S3D (Figure 5) illustrates that the waves carrying significant GWMF were identified. There could indeed be waves with large zonal wavelengths in the residual fields that we couldn't characterize in the observational geometry, but as the GWMF agrees well, they either do not exist or do not carry significant momentum.

- **Lines 191-193: You might add that structured noise from something like stray light would also be very difficult and challenging to properly simulate and account for.**

We have updated the manuscript with a note regarding this:

L192: Structured noise, such as stray light, that could appear in the raw images taken by MATS, and then propagate into the tomography, is neglected. Such features are assumed to have been removed in the earlier stages of the data processing, [as they are difficult to predict and properly account for](#).

- **Lines 240-241: I may have missed it earlier in the paper, but for completeness you might want to mention whether the HIAMCM data is a boreal summer and austral winter case?**

This is mentioned in the article. On line 112 we specify that the HIAMCM snapshot is from January 1st, 2016. In the updated manuscript it is now also mentioned in the conclusions:

L345: [This study was performed on a HIAMCM snapshot from 1st January 2016](#).

- **Lines 269-271: The proposed cuboids have an asymmetry in size along and across the track, which seems to lead to an anisotropy in spectral sensitivity of the gravity wave measurements along and across the track. Such an anisotropy can cause some difficulty in interpreting measurement results. This can be seen in the example presented here for the polar regions. Perhaps you could discuss and clarify why using such unbalanced cube sizes is still advantageous compared to e.g. using a cube size of 200 km x 200 km x 10 km?**

It is generally preferable to have cuboids with horizontal sides of equal lengths. The choice of non-equidistant cuboid size was selected based on the range limitations in the across-track dimension. Chen et al., (2022) successfully described the GWMF at 75 km using 600 x 600 cuboids and at 130 km using 300 x 300.

For MATS observational geometry, the across-track is limiting, and along this dimension, we have made the cuboids as large as possible, i.e. 600 km x 200 km. This has the additional advantage that the number of points along each dimension is of similar size because of the different sampling rates across-track and along-track. This is now stated in the updated manuscript (Sect. 2.4 S3D):

L148: The cuboid sizes are therefore chosen to be 600 km x 190 km x 10 km ([along-track x across-track x vertical](#)). This has the additional advantage that the number of points along the horizontal directions are of similar order because of the different sampling rates across-track and along-track: 31 x 39 x 11.

- **Lines 286-287: When discussing vertical smoothing, it would be good to provide some information on the vertical resolution of the HIAMCM test data. The MATS measurements have a vertical resolution of 500 m, and averaging**

**kernels with FWHMs of 1 km and 2 km are considered for the retrieval data. Is the HIAMCM vertical resolution comparable or better?**

The vertical resolution of HIAMCM is comparable, with a vertical resolution of approximately 600 m below 130 km. We add this to the discussions of lines 286-287.

L287: This is not surprising as the vertical resolution is close to the length scales of the vertical wavelengths in the data (HIAMCM approximately has a vertical resolution of 600 m below 130 km). Consequently, small changes can cut off significant amounts of momentum.

### **Technical corrections**

- **line 201: Section -> Sect.**

Addressed in the updated manuscript.

- **line 220: efficiently -> effectively (?)**

Addressed in the updated manuscript.

## References

Chen, Q., Ntokas, K., Linder, B., Krasauskas, L., Ern, M., Preusse, P., Ungermann, J., Becker, E., Kaufmann, M., and Riese, M.: *Satellite<sup>400</sup>*

*observations of gravity wave momentum flux in the mesosphere and lower thermosphere (MLT): feasibility and requirements*, *Atmos. Meas. Tech.*, 15, 7071–7103, <https://doi.org/10.5194/amt-15-7071-2022>, 2022.

Strube, C., Ern, M., Preusse, P., and Riese, M.: *Removing spurious inertial instability signals from gravity wave temperature perturbations using spectral filtering methods*, *Atmos. Meas. Tech.*, 13, 4927–4945, <https://doi.org/10.5194/amt-13-4927-2020>, 2020.
